# Supplementary material for: Lepidium graminifolium L.: Glucosinolate Profile and Antiproliferative Potential of Volatile Isolates
Source: MDPI journal article supplement (doi:10.3390/molecules26175183), 2021-08-27
Supplement: s1 [file s1]

## Supplementary Materials

# *Lepidium graminifolium* L.: Glucosinolate Profile and Antiproliferative Potential of Volatile Isolates

Azra Đulović<sup>1a</sup>, Franko Burčul<sup>1b</sup>, Vedrana Čikeš Čulić<sup>2</sup>, Mirko Ruščić<sup>3</sup>, Petra Brzović<sup>1a</sup>, Sabine Montaut<sup>4</sup>, Patrick Rollin<sup>5</sup>, Ivica Blažević<sup>1a\*</sup>

<sup>1</sup> University of Split, Faculty of Chemistry and Technology, a) Department of Organic Chemistry, b) Department of Analytical Chemistry, Ruđera Boškovića 35, 21000 Split, Croatia; blazevic@ktf-split.hr (I.B.); azra@ktf-split.hr (A.Đ.); franko@ktf-split.hr (F.B.)

<sup>2</sup> University of Split, School of Medicine, Šoltanska 2, 21000 Split, Croatia; vedrana.cikes.culic@mefst.hr

<sup>3</sup> University of Split, Faculty of Science, Department of Biology, Ruđera Boškovića 33, 21000 Split, Croatia; mrus@pmfst.hr

<sup>4</sup> School of Biological, Chemical and Forensic Sciences, Biomolecular Sciences Programme, Laurentian University, 935 Ramsey Lake Road, Sudbury, ON, P3E 2C6, Canada; smontaut@laurentian.ca

<sup>5</sup> ICOA, Université d'Orléans et CNRS, UMR 7311, Orléans, France; patrick.rollin@univ-orleans.fr

\* Correspondence: blazevic@ktf-split.hr; Tel.: +385 21 329 434

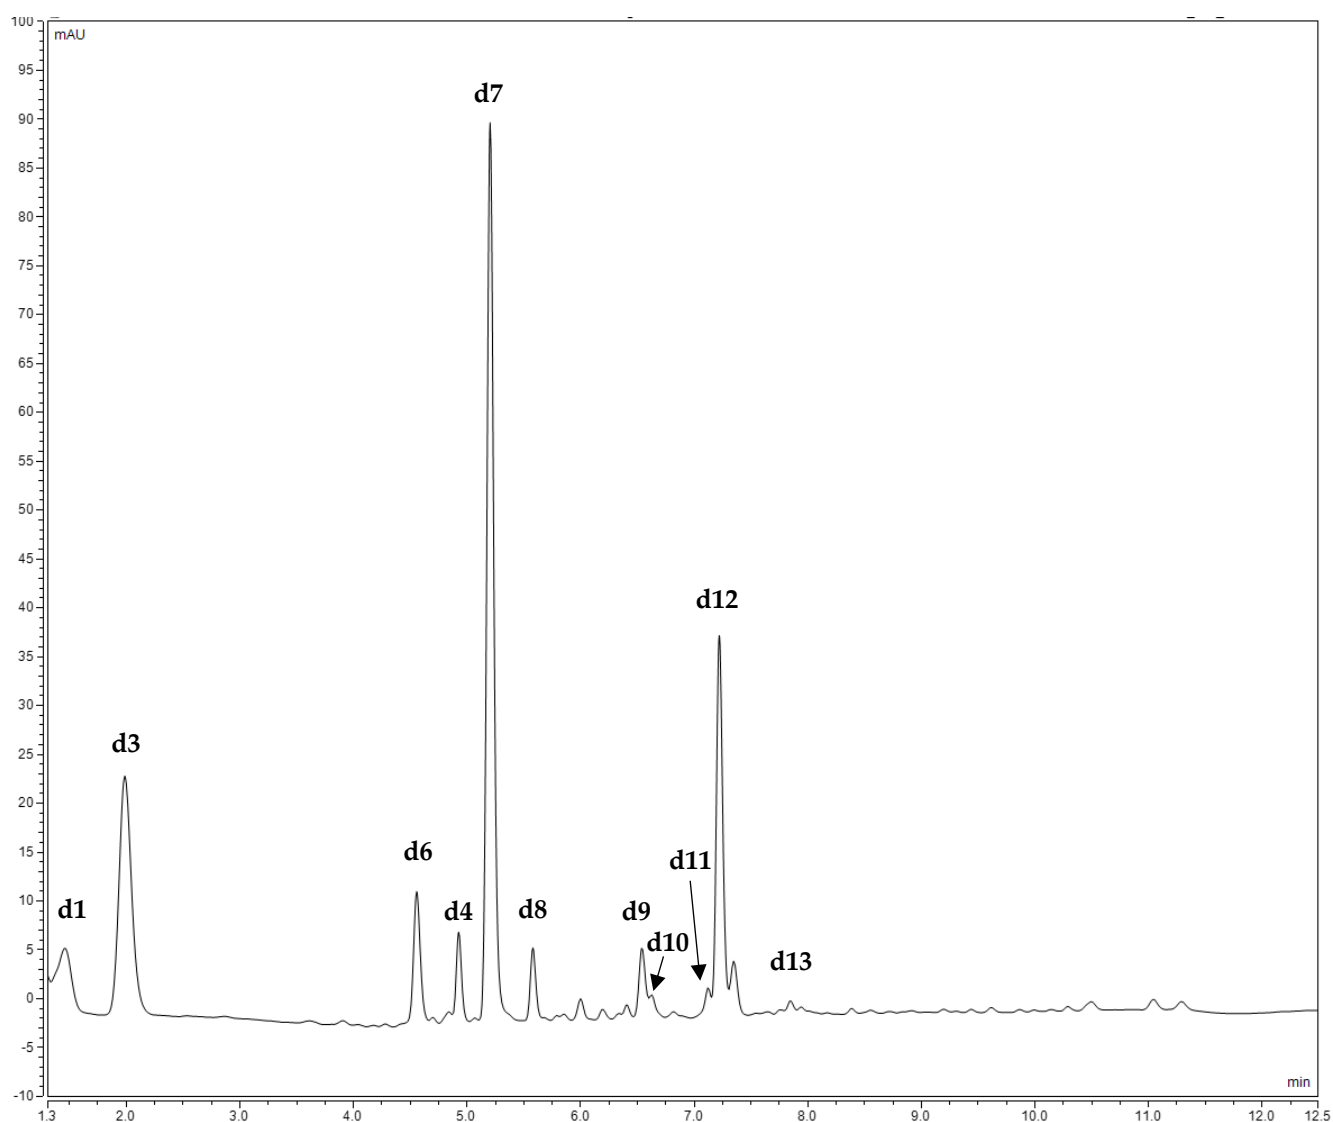

**Figure S1.** Chromatogram of desulfo-GSLs obtained from the aerial parts of *L. graminifolium* from Rab Island:

**d1** - (2*R*)-Hydroxybut-3-enyl GSL (progoitrin), **d3** - (2*S*)-Hydroxybut-3-enyl GSL (epiprogoitrin), **d4** - But-3-enyl GSL (gluconapin), **d6** - 4-Hydroxybenzyl GSL (glucosinalbin), **d7** - 3-Hydroxybenzyl GSL (glucolepigramin), **d8** - 4-Hydroxy-3,5-dimethoxybenzyl GSL (3,5-dimethoxysinalbin), **d9** - Benzyl GSL (glucotropaeolin), **d10** - 3,4-Dimethoxybenzyl GSL, **d11** - 3,4,5-Trimethoxybenzyl GSL, **d12** - 3-Methoxybenzyl GSL (glucolimnanthin), **d13** - 2-Phenylethyl GSL (gluconasturtiin).

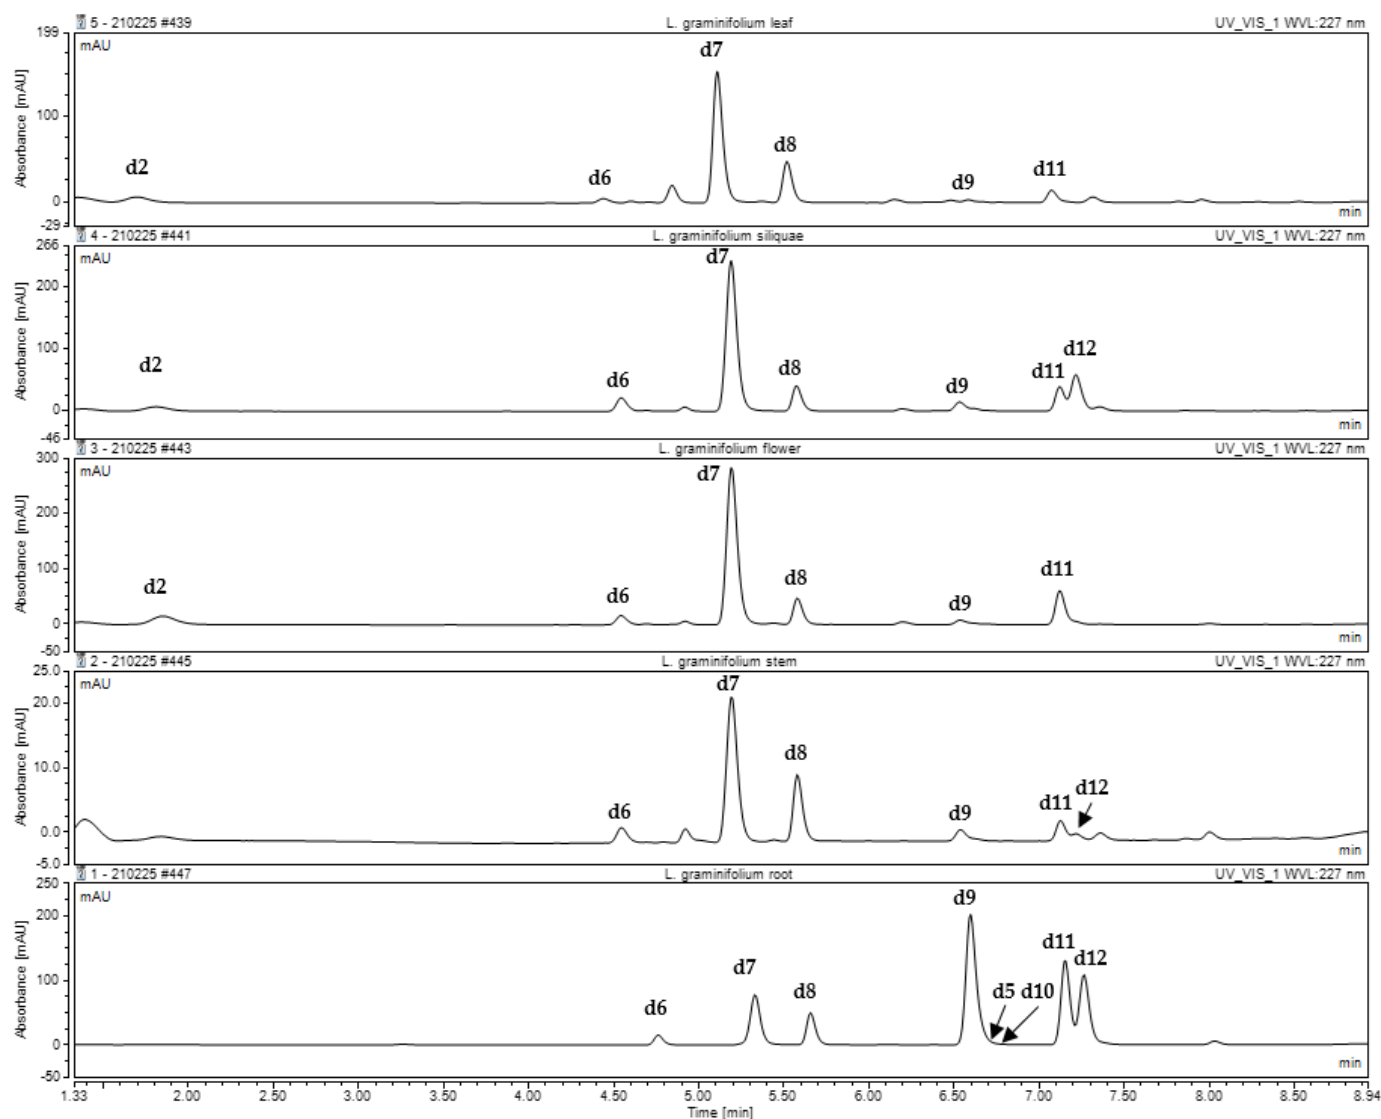

**Figure S2.** Chromatogram of desulfo-GSLs obtained from the leaf, siliquae, flower, stem and root of *L. graminifolium* from Split: **d2** - (2S)-Hydroxybut-3-enyl GSL (glucoraphanin), **d5** - 4-(Methylsulfanyl)butyl GSL (glucoerucin), **d6** - 4-Hydroxybenzyl GSL (glucosinalbin), **d7** - 3-Hydroxybenzyl GSL (glucolepigramin), **d8** - 4-Hydroxy-3,5-dimethoxybenzyl GSL (3,5-dimethoxysinalbin), **d9** - Benzyl GSL (glucotropaeolin), **d10** - 3,4-Dimethoxybenzyl GSL, **d11** - 3,4,5-Trimethoxybenzyl GSL, **d12** - 3-Methoxybenzyl GSL (glucolimnanthin).

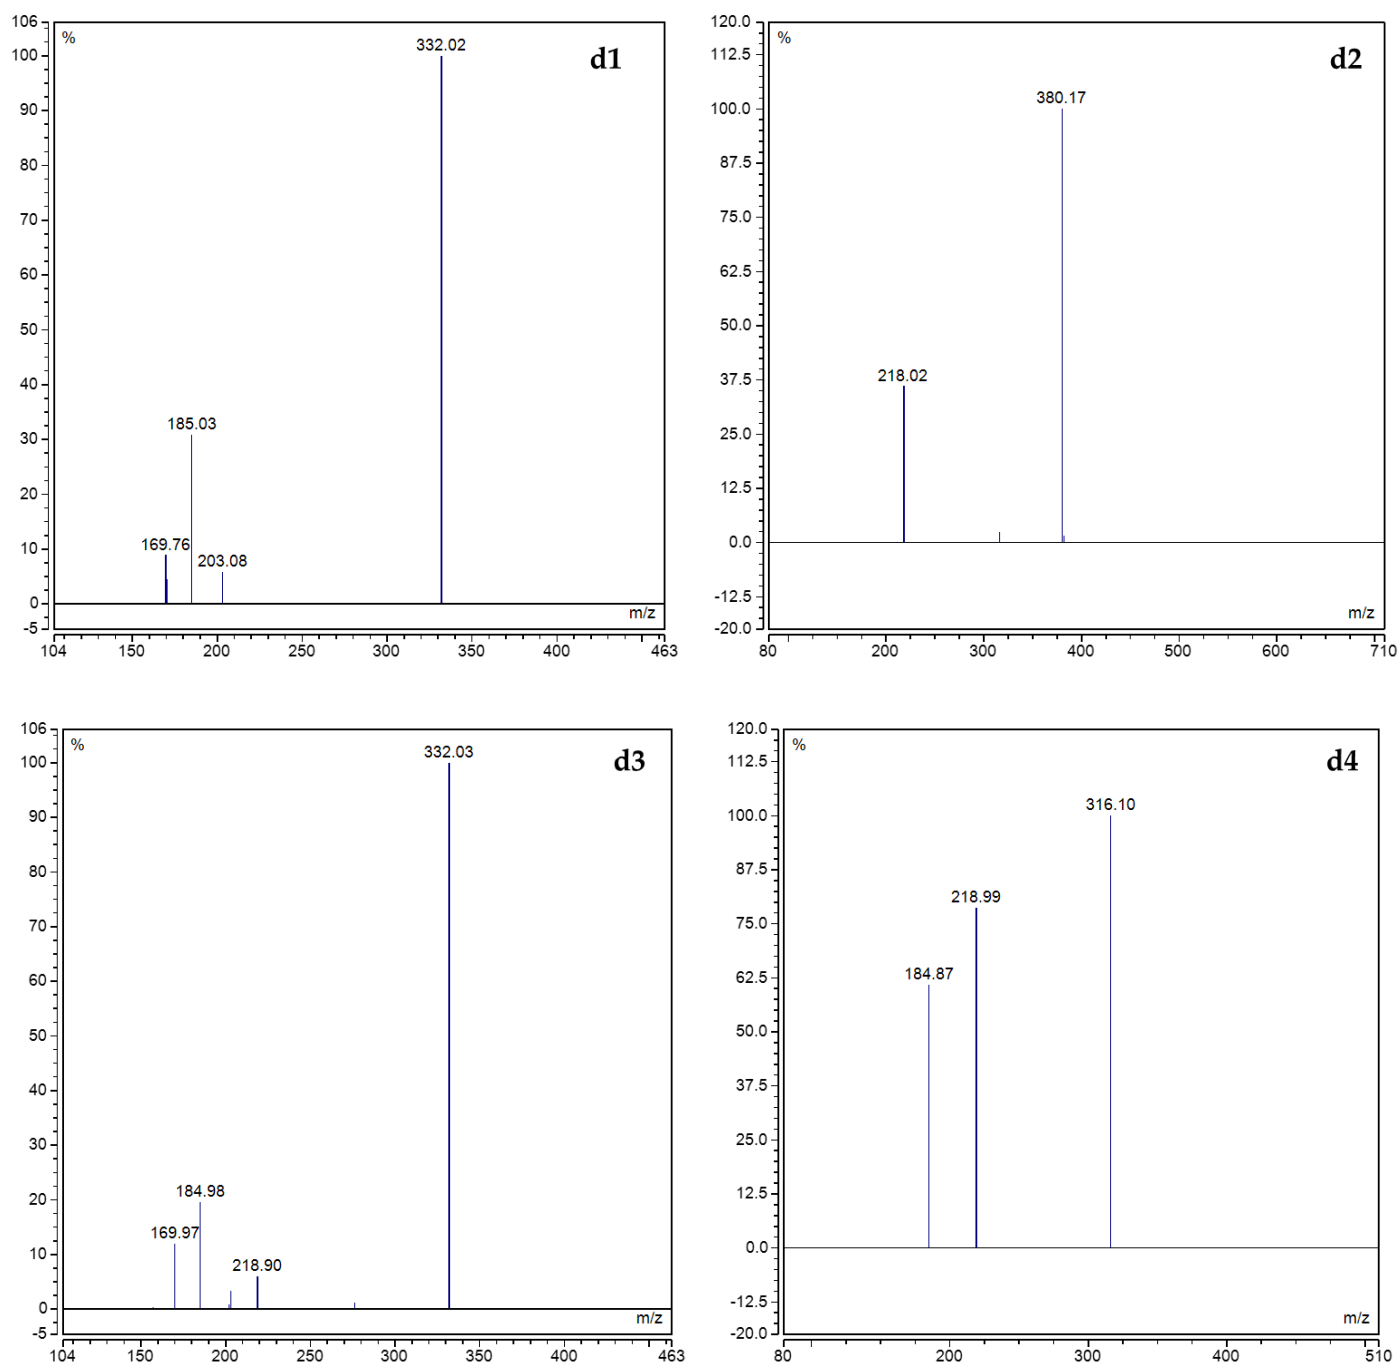

Figure S3. Continuous

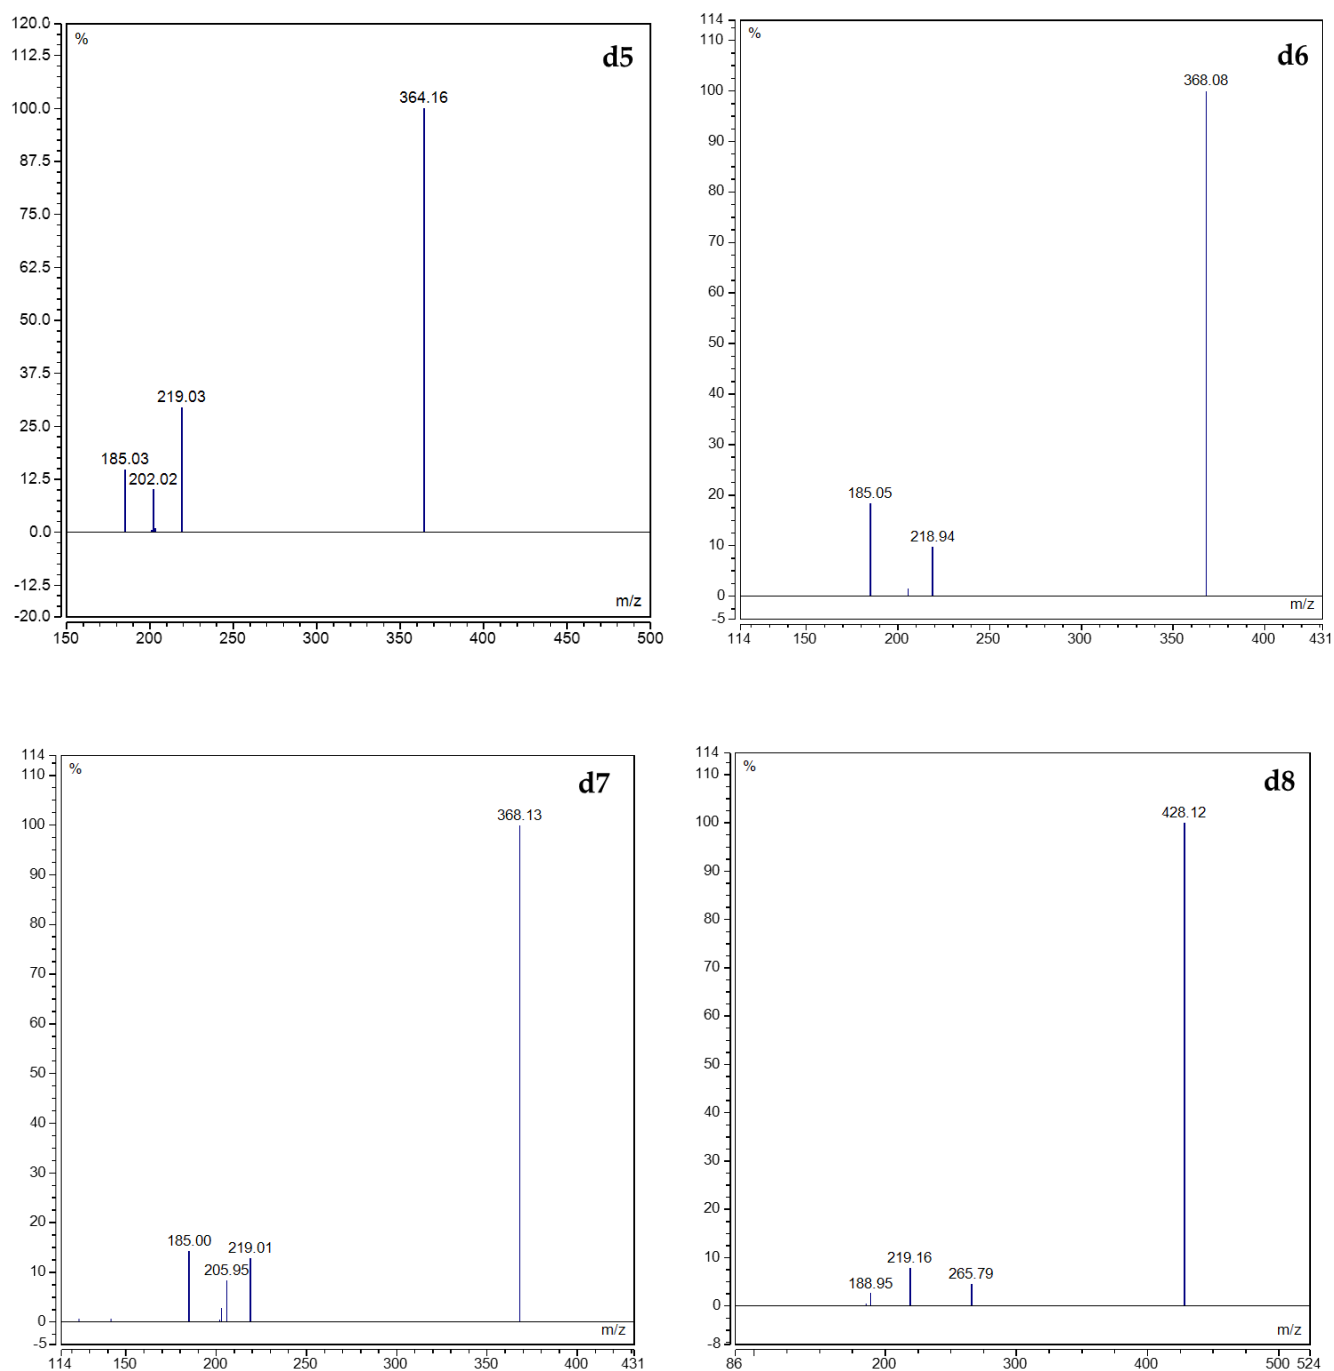

Figure S3. Continuous

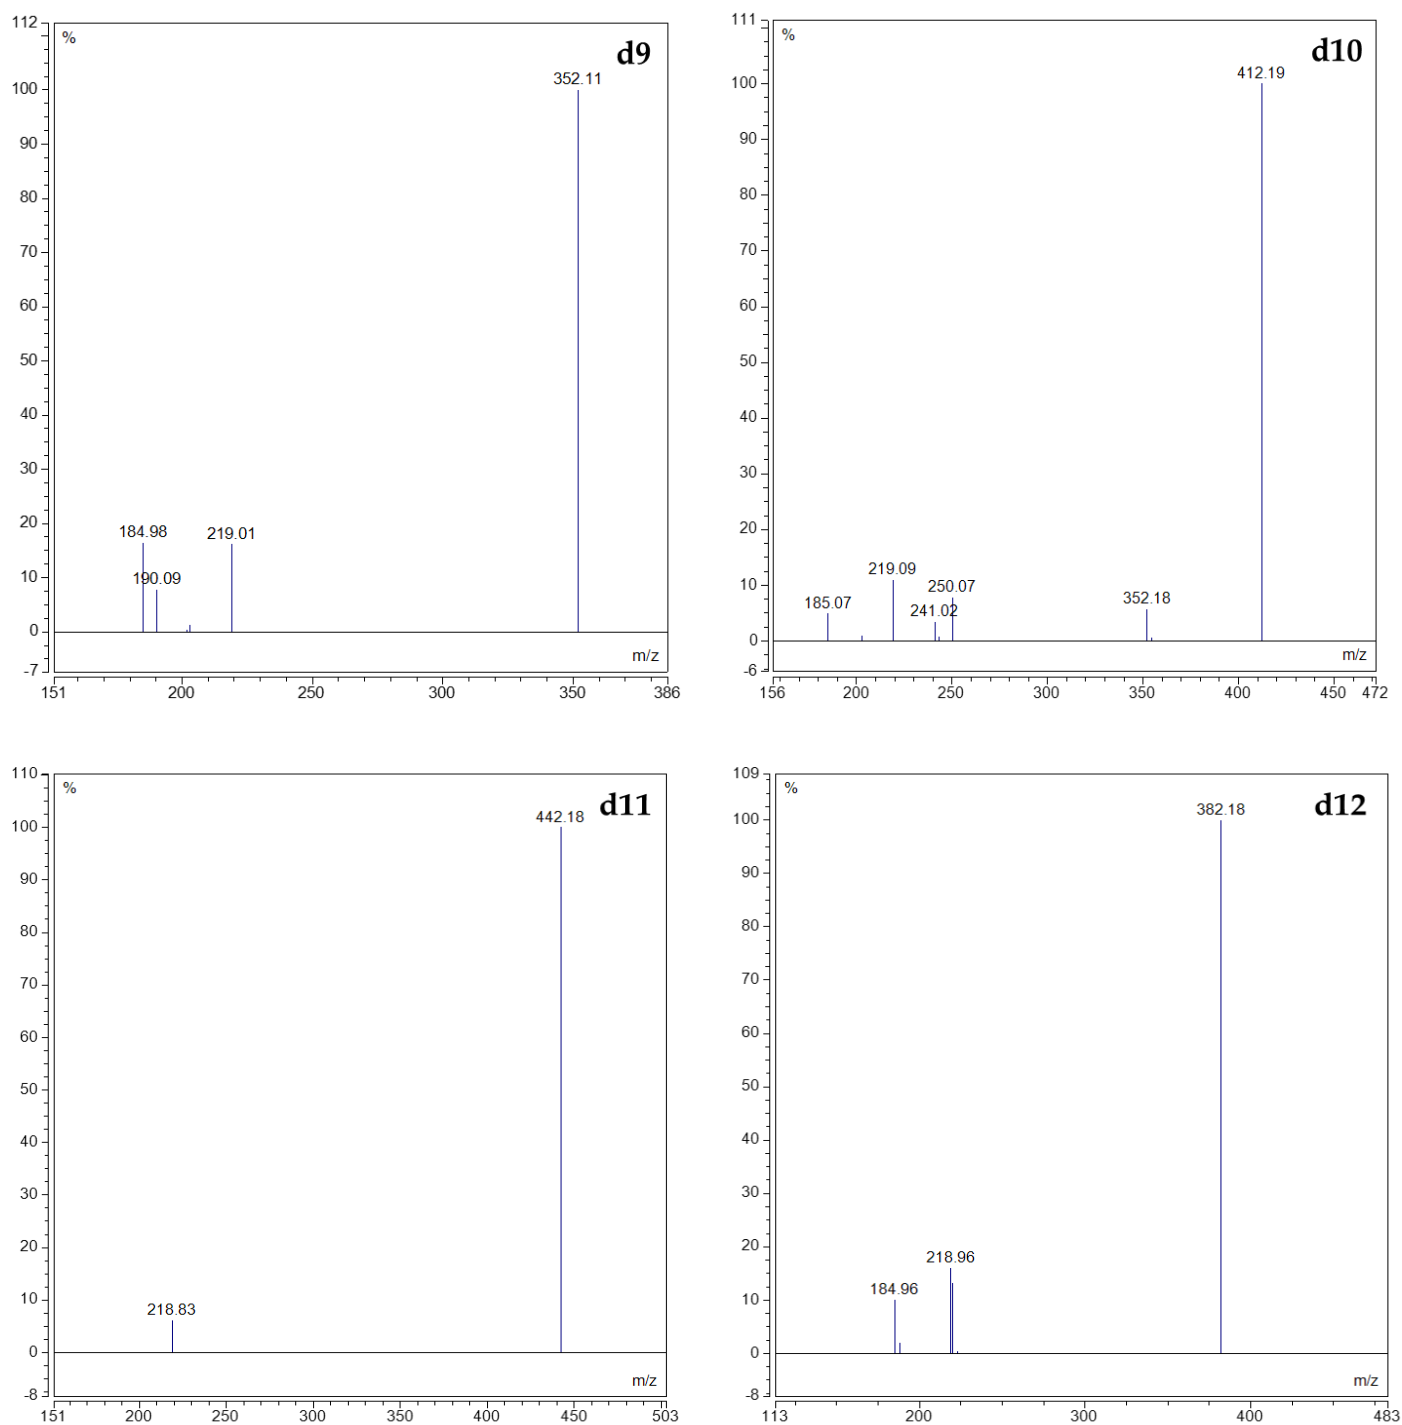

Figure S3. Continuous

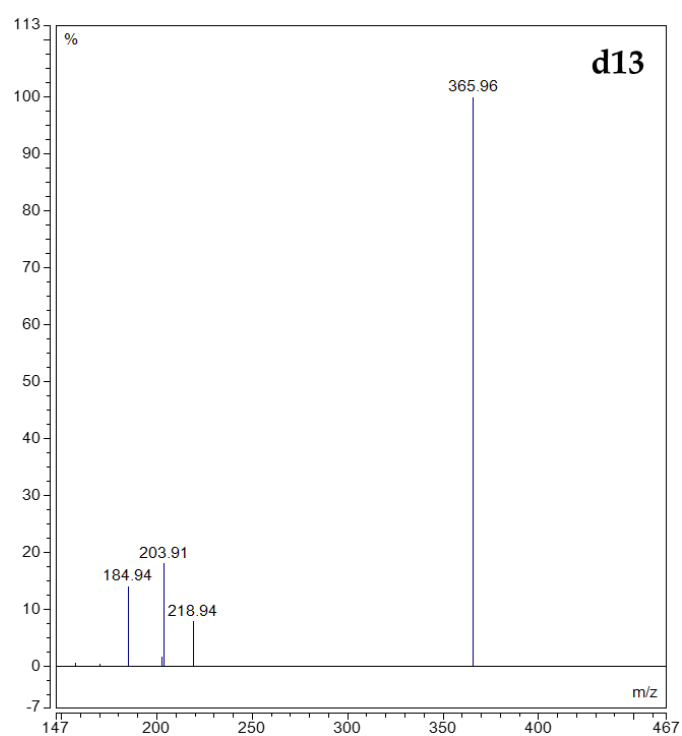

**Figure S3.** MS<sup>2</sup> spectra at 15V ionization of desulfo-GSLs detected: **d1- d13**.

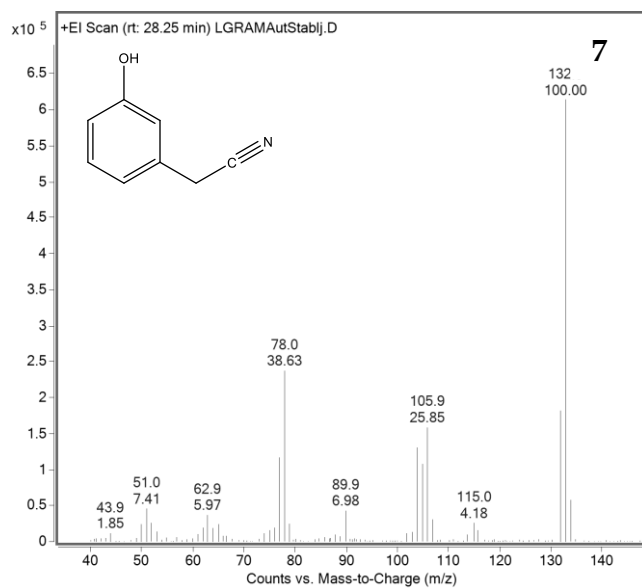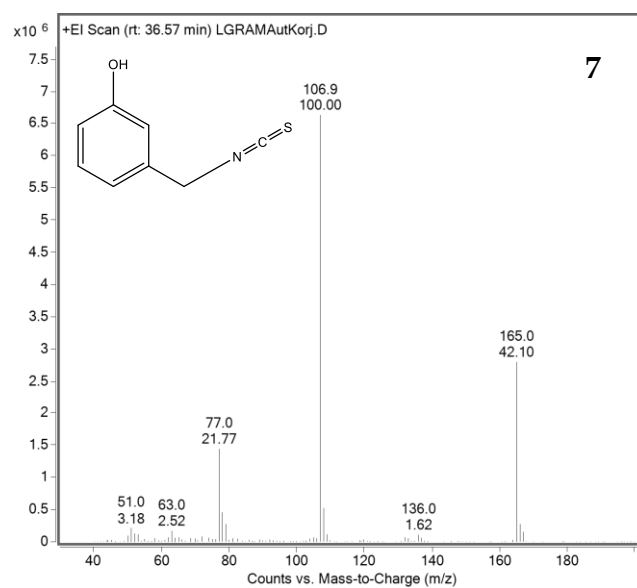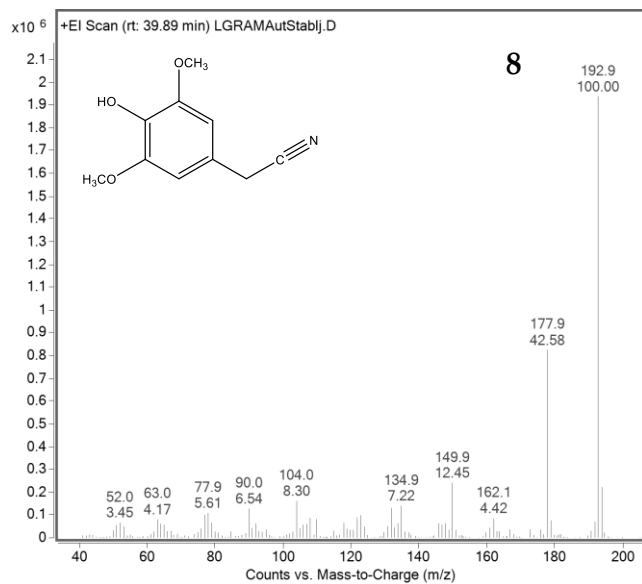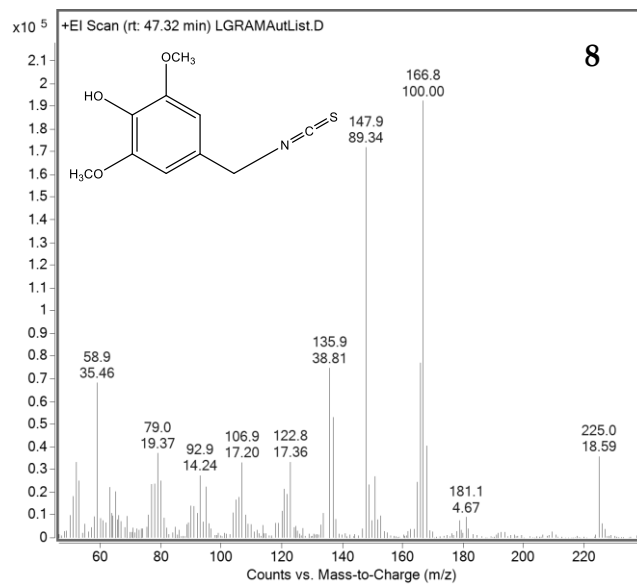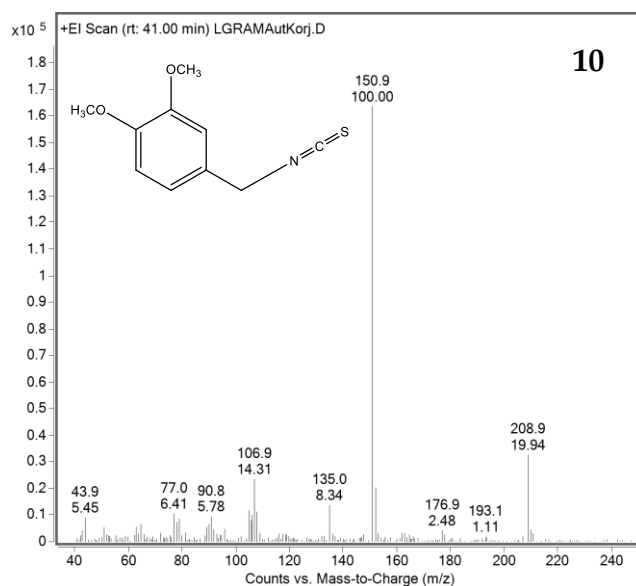



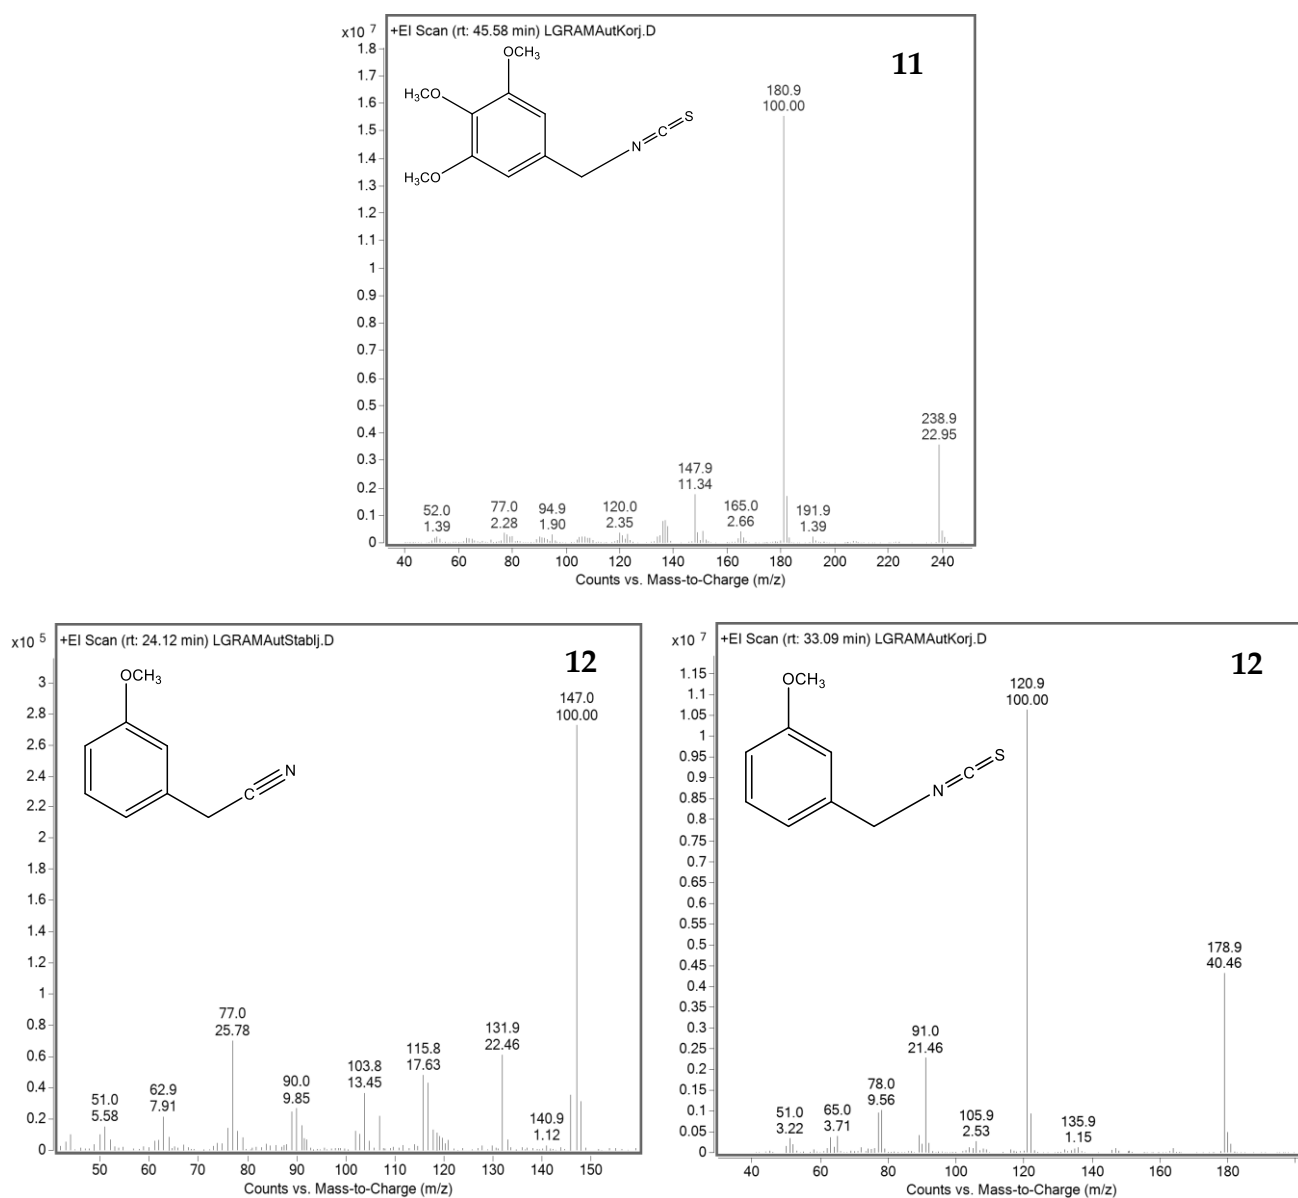

**Figure S4.** MS spectra of degradation products originating from substituted benzylic-type GSLs. Numbers correspond to Table 1 and Figure 1.
